# Supplementary material
Source: PubMed Central journal article supplement (PMC7606609)

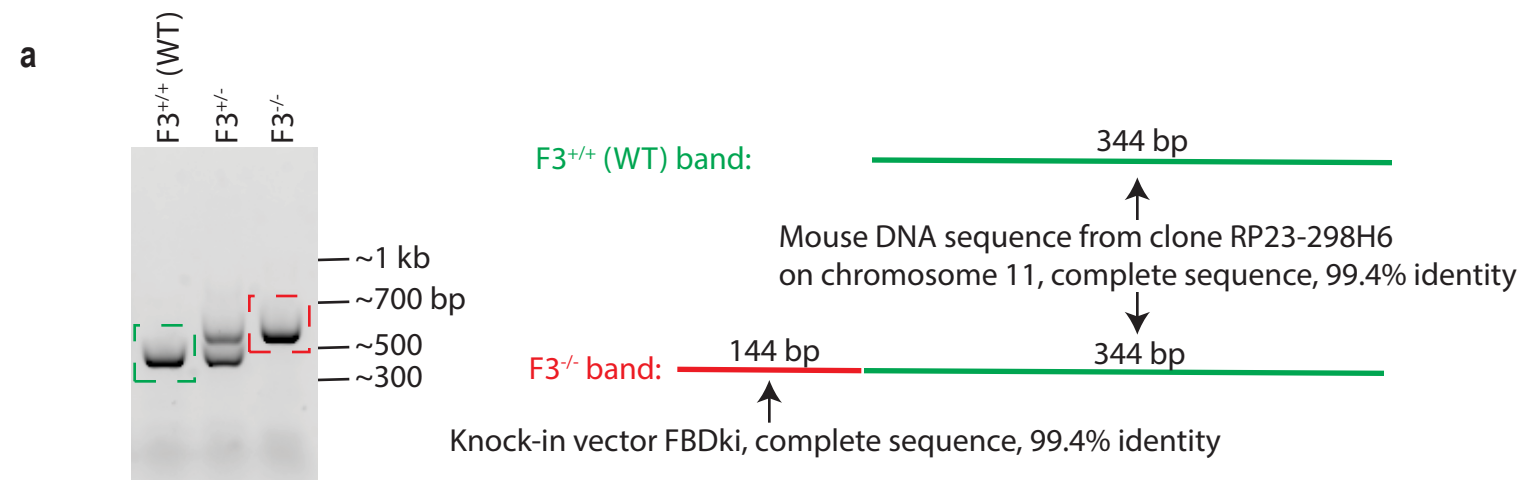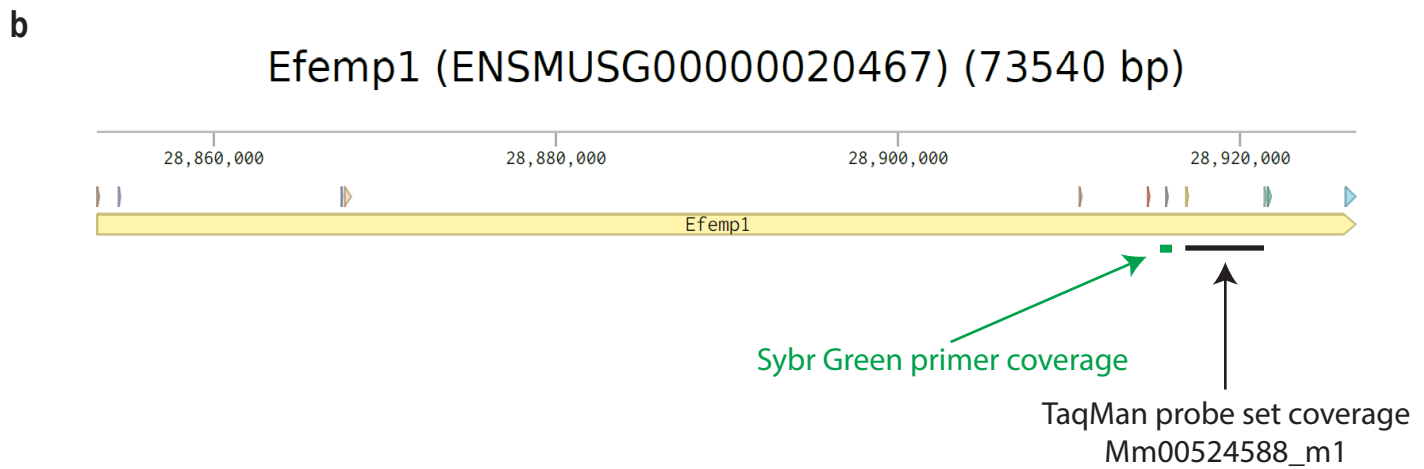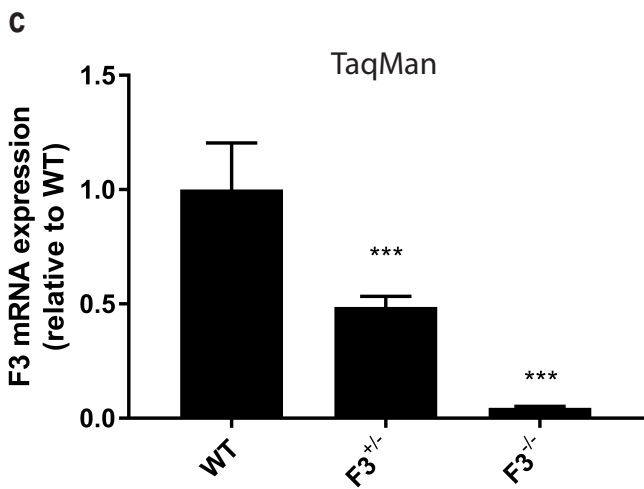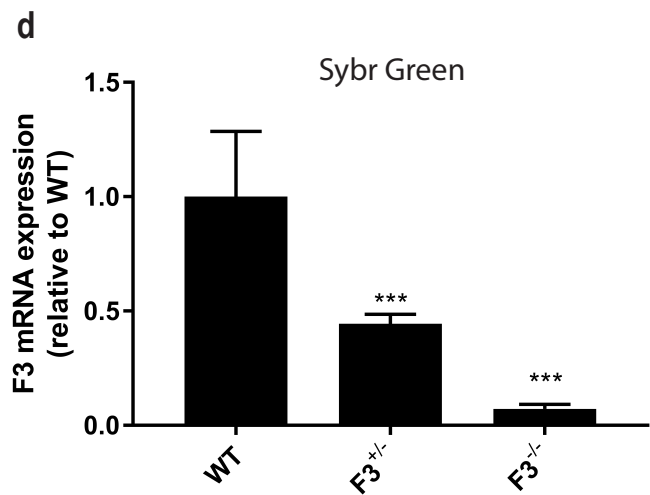

Supplement: NIHMS1631865-supplement-109_2020_1974_MOESM1_ESM.pdf [file NIHMS1631865-supplement-109_2020_1974_MOESM1_ESM.pdf]

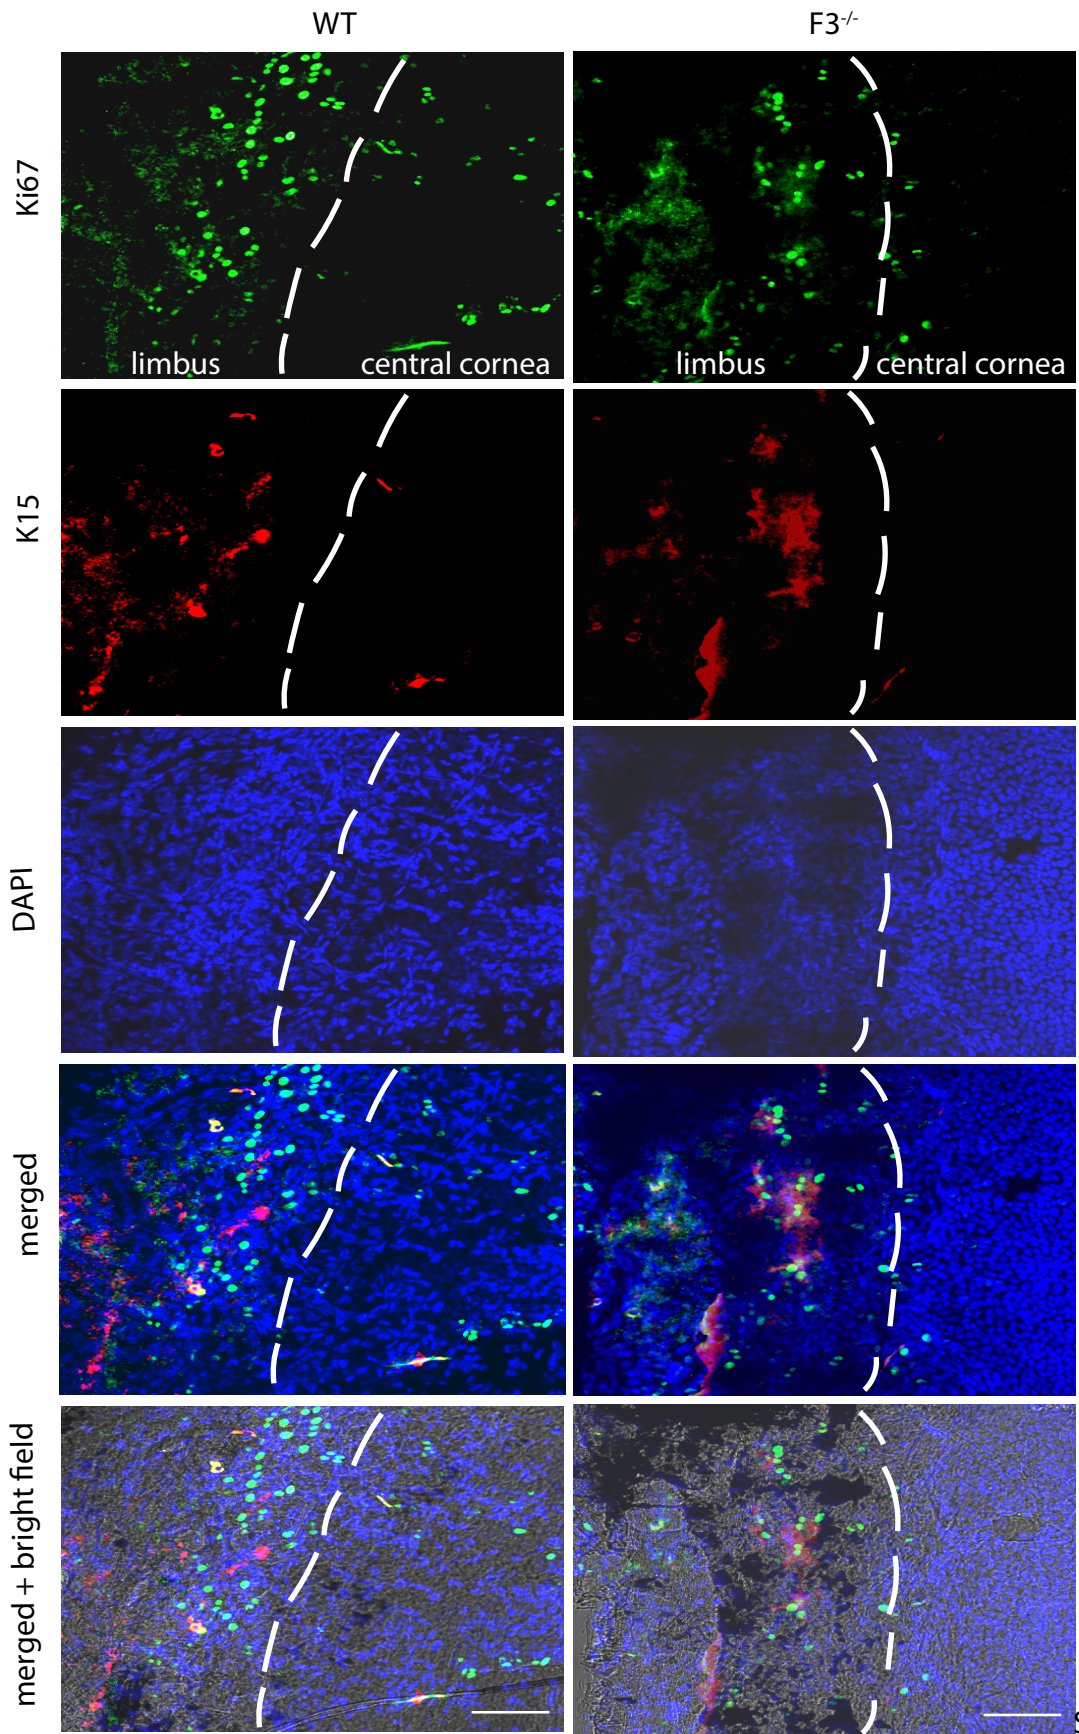

Supplement: NIHMS1631865-supplement-109_2020_1974_MOESM2_ESM.pdf [file NIHMS1631865-supplement-109_2020_1974_MOESM2_ESM.pdf]

a

WT

F3<sup>-/-</sup>

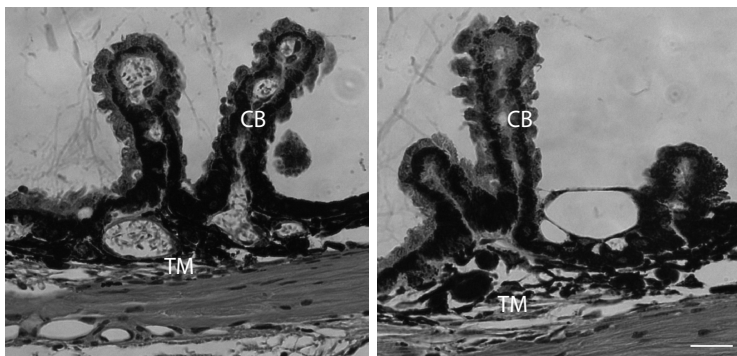

C

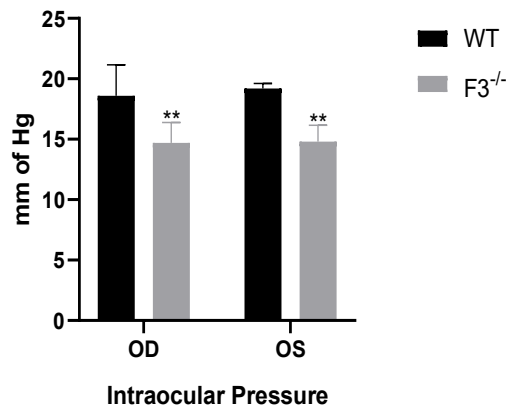

b

WT

F3<sup>-/-</sup>

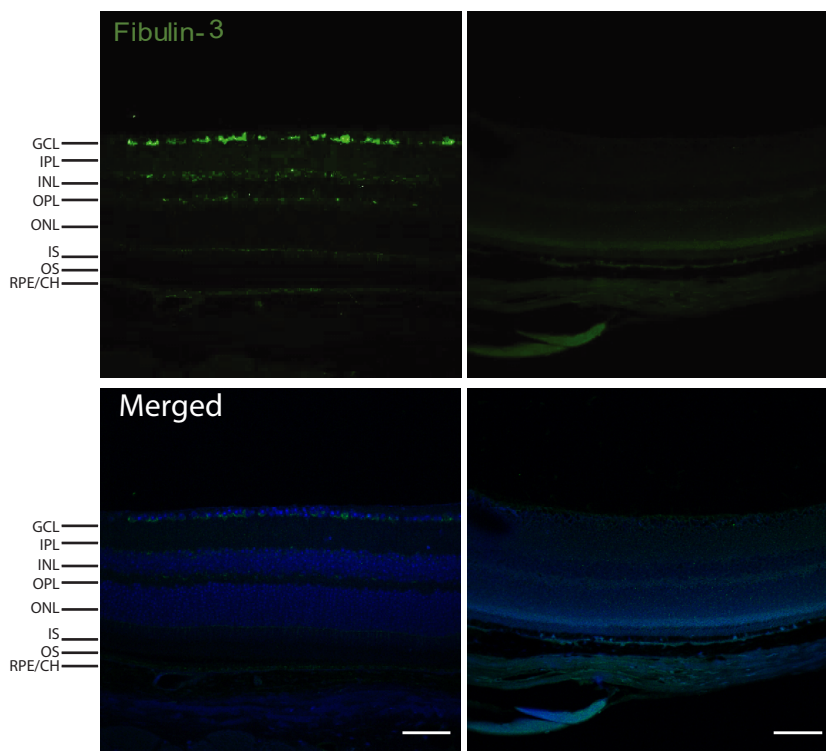

Supplement: NIHMS1631865-supplement-109_2020_1974_MOESM3_ESM.pdf [file NIHMS1631865-supplement-109_2020_1974_MOESM3_ESM.pdf]

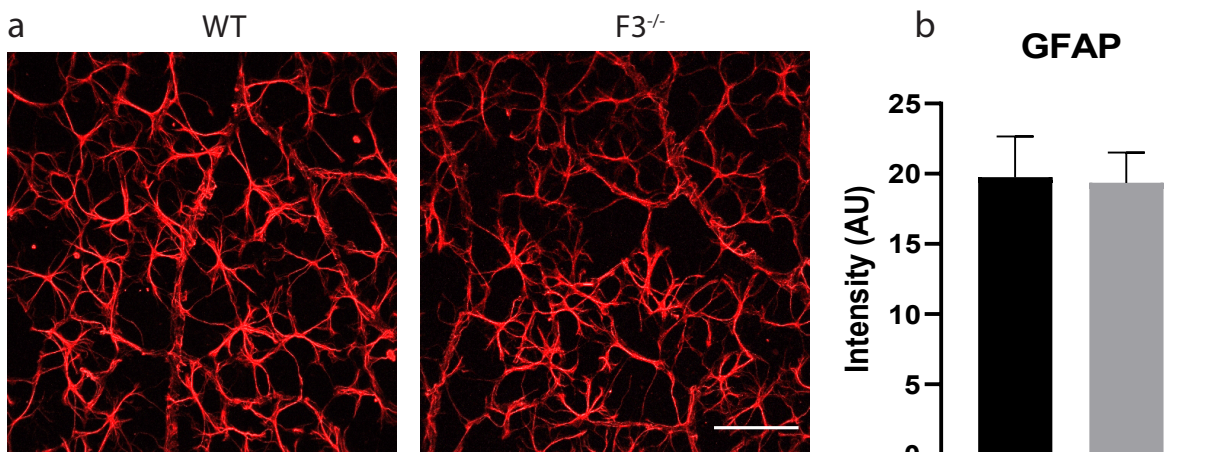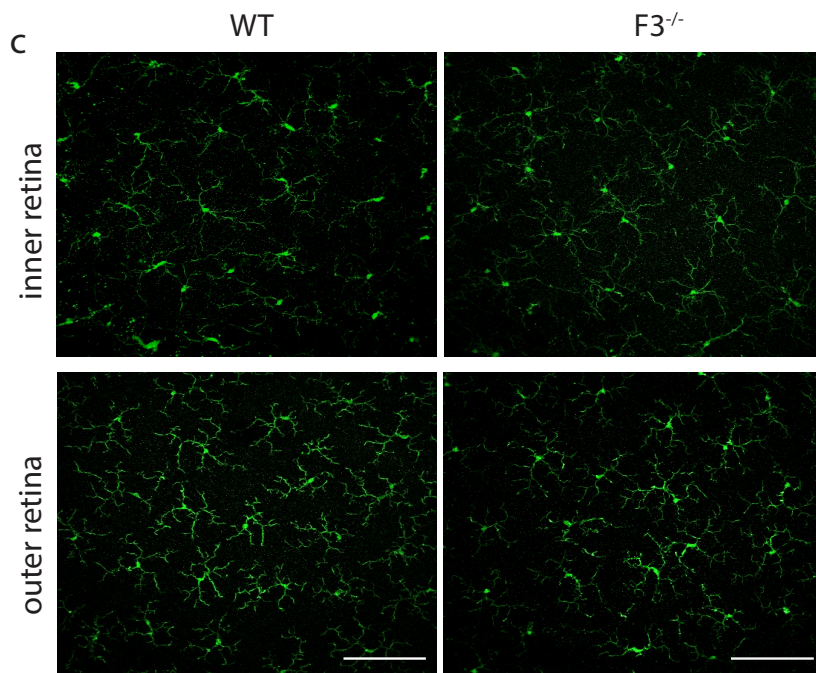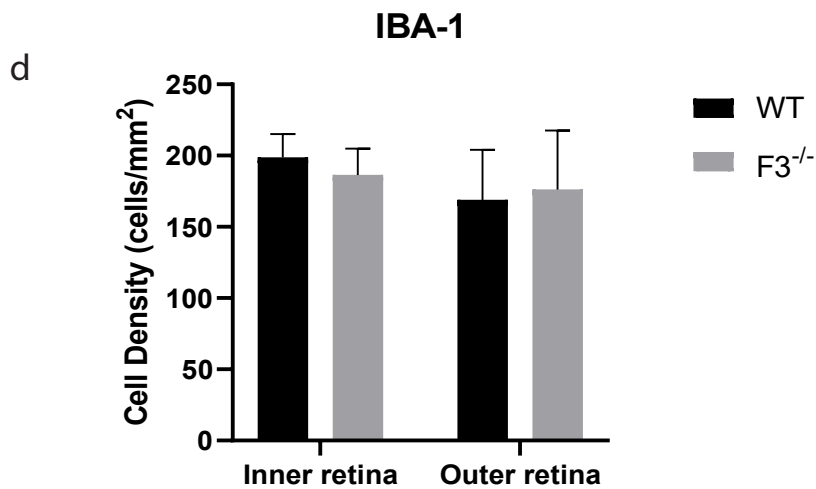

Supplement: NIHMS1631865-supplement-109_2020_1974_MOESM4_ESM.pdf [file NIHMS1631865-supplement-109_2020_1974_MOESM4_ESM.pdf]

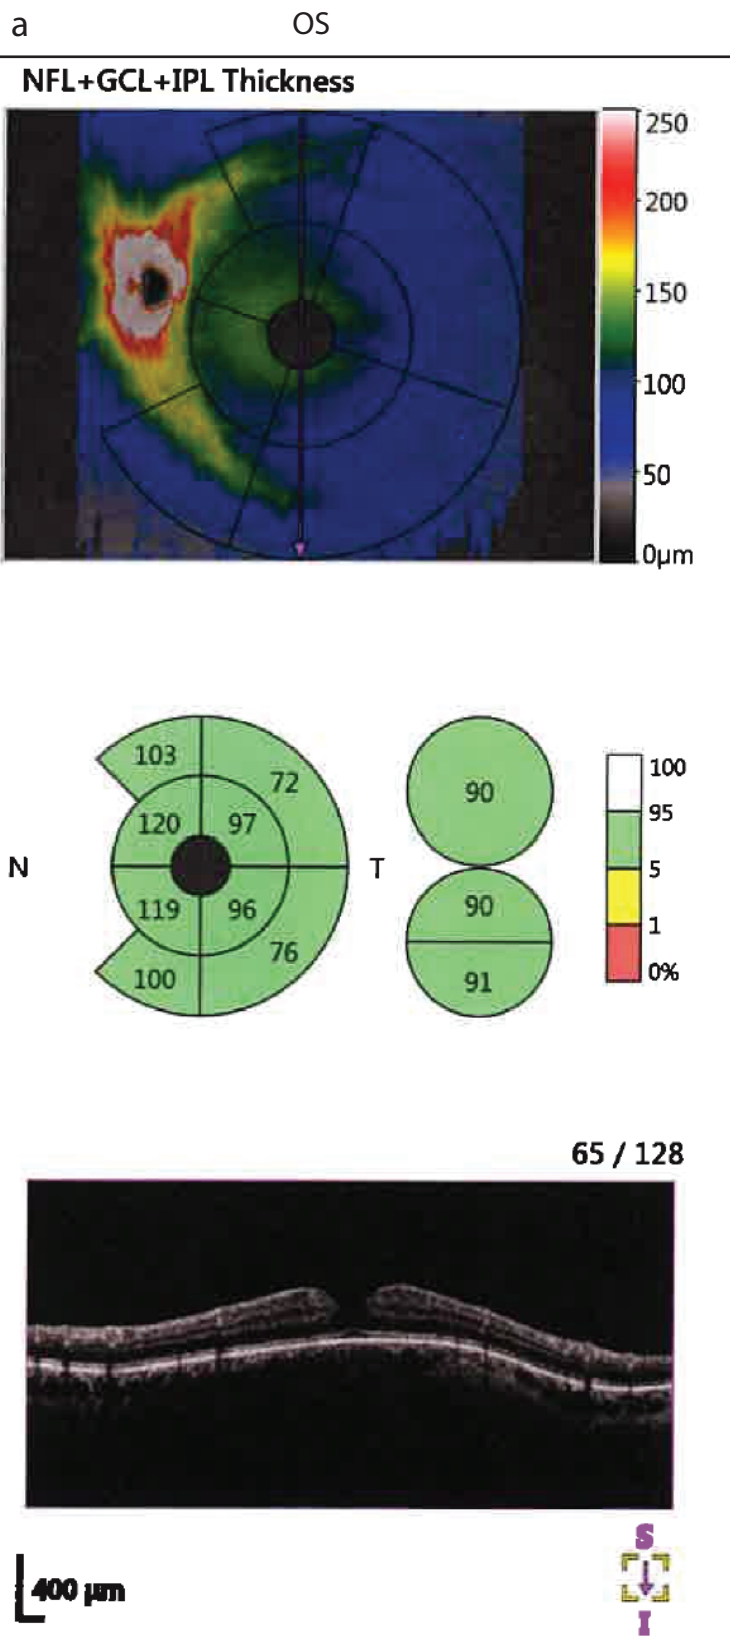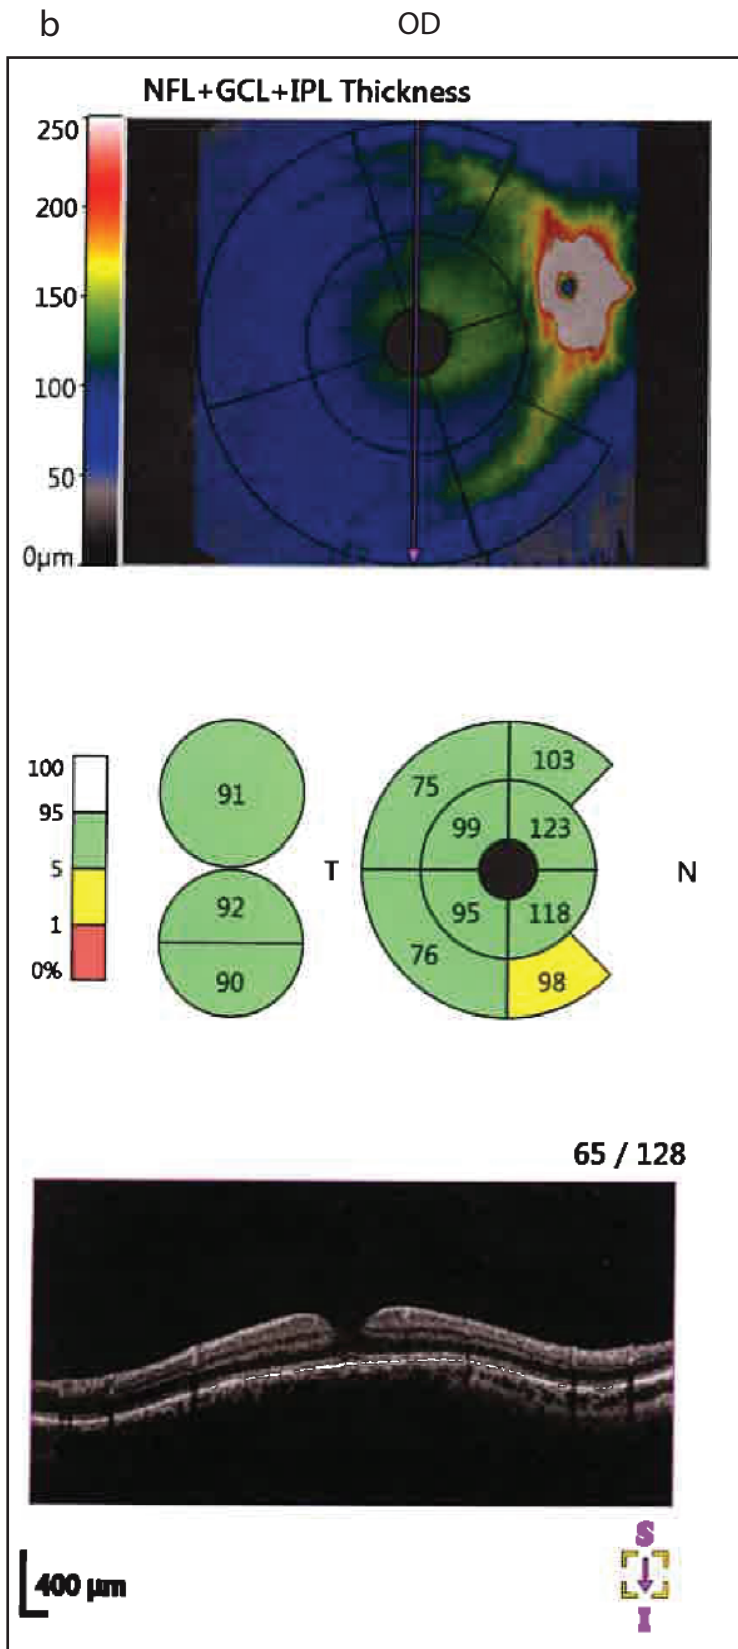

Supplement: NIHMS1631865-supplement-109_2020_1974_MOESM5_ESM.pdf [file NIHMS1631865-supplement-109_2020_1974_MOESM5_ESM.pdf]

a

OS

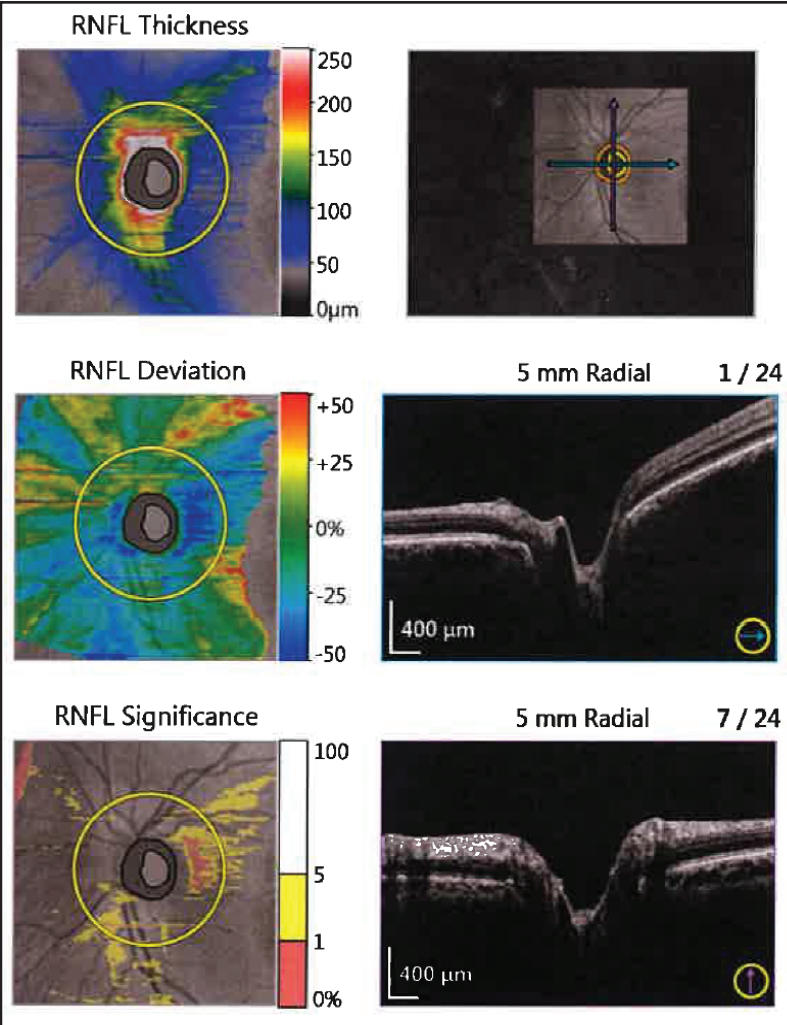

b

OD

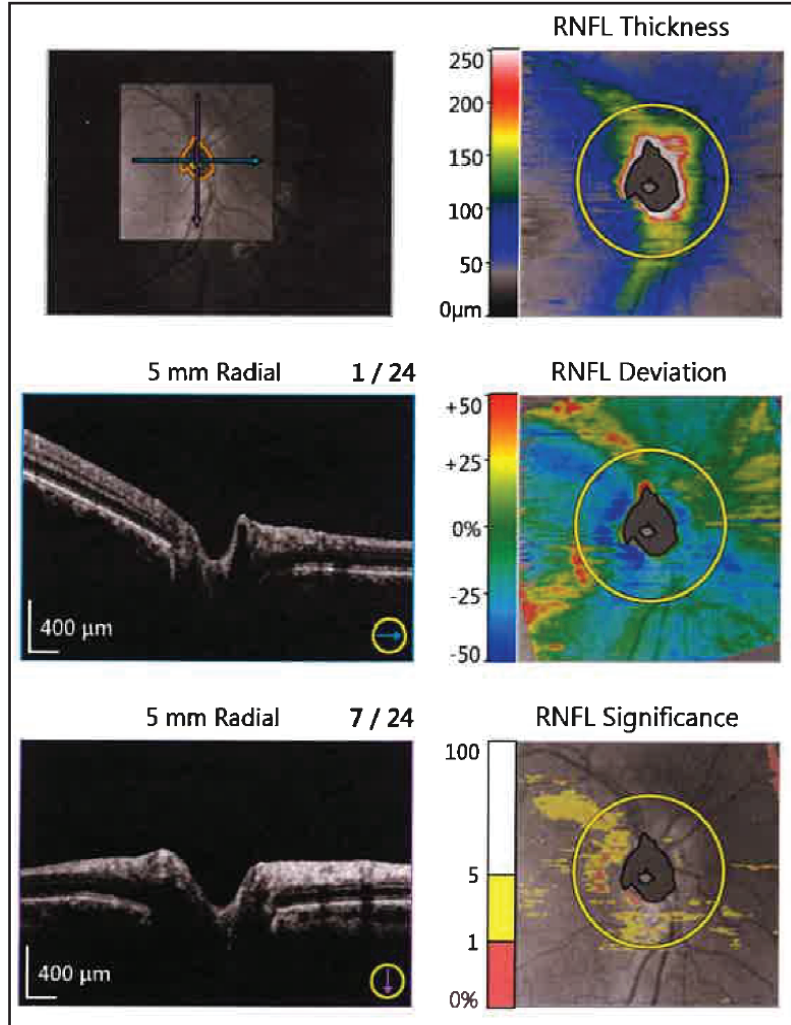

Supp. Fig. 6

Supplement: NIHMS1631865-supplement-109_2020_1974_MOESM6_ESM.pdf [file NIHMS1631865-supplement-109_2020_1974_MOESM6_ESM.pdf]
